# Supplementary material
Source: PubMed Central journal article supplement (PMC2925039)
Supplement: Supp_Fig.pdf [file Supp_Fig.pdf]

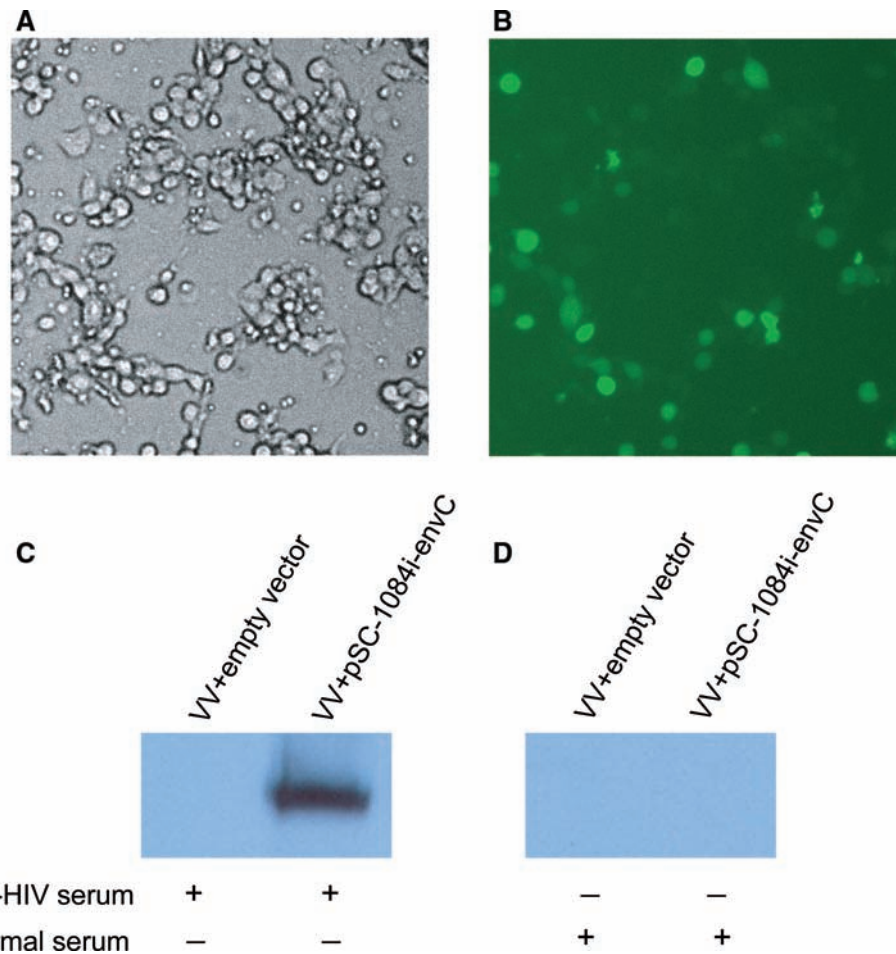

**SUPPLEMENTAL FIG. 1.** Expression of HIV1084i EnvC from 293T cells after infection with wild-type VV and transfection with pSC-1084i-envC. (A) Phase-contrast microscopy and (B) fluorescent microscopy of 293T cells infected with VV and transfected with pSC-1084i-envC. Infected cells were lysed in Laemmli buffer, and cell extracts were electrophoresed in a gradient PAGE gel (4–12%); proteins were transferred to a PVDF membrane and probed with (C) anti-HIV serum and (D) normal serum.

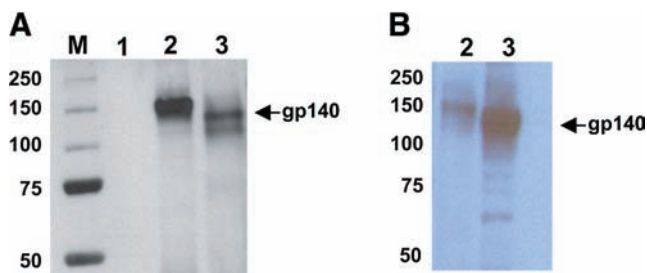

**SUPPLEMENTAL FIG. 2.** Western blot analysis of purified EnvC proteins. Purified EnvC protein and control gp160 were fractionated in SDS-PAGE; proteins were transferred to the PVDF membrane and probed with (A) human anti-HIV-1 serum and (B) anti-HIV-1 gp120 monoclonal antibody. M, molecular weight marker; lane 1, 2 µg of protein from mock-infected cells; lane 2, HIV-1 gp160 as positive control; lane 3, 2 µg of purified EnvC (gp140).
